# Supplementary material for: Micrometastases or Isolated Tumor Cells and the Outcome of Breast Cancer
Source: Atypon-hosted journal article supplement (doi:10.1056/nejmoa0904832), 2009-08-12
Supplement: nejm_de_boer_653sa1.pdf [file nejm_de_boer_653sa1.pdf]

## Supplementary Appendix

This appendix has been provided by the authors to give readers additional information about their work.

Supplement to: de Boer M, van Deurzen CHM, van Dijck JAAM, et al. Micrometastases or isolated tumor cells and the outcome of breast cancer. *N Engl J Med* 2009;361:653-63.

**Supplementary Table 1. Individuals and Institutions Participating in This Study**

*Comprehensive Cancer Centre East, Nijmegen* - C. Lennards; *Canisius Wilhelmina Hospital, Nijmegen* - C. Wauters, L. Strobbe; *Radboud University Medical Centre, Nijmegen* - Th. Wobbes; *Maas Hospital, Boxmeer* - A. Meersman; *Rijnstate Hospital, Arnhem* - F. van de Molengraft, R. Keus, J. Klinkenbijl; *Gelderse Vallei Hospital, Ede* - E. Balk, J. Kroeze; *Zevenaar Hospital, Zevenaar* - J. van Wijk; *Slingeland Hospital, Doetinchem* - E. Muller; *St. Jansdal Hospital, Harderwijk* - R. Tobon Morales; *Comprehensive Cancer Centre Amsterdam, Amsterdam* - O. Visser, W. Heijbroek-de Clerq; *Academic Medical Centre, Amsterdam* - M. van de Vijver, A. Kluit; *IJsselmeerziekenhuizen, Lelystad* - E. Neefjes-Borst, G. Algie; *Onze Lieve Vrouwe Gasthuis, Amsterdam* - E. Nijhuis, P. Borgstein; *Flevo Hospital, Almere* - M. Regoort; *Medical Centre Alkmaar, Alkmaar* - H.J. van Slooten, B. Langenhorst; *Gemini Hospital, Den Helder* - H. Tjeenk Willink; *Westfries Gasthuis, Hoorn* - J.W. Jansen, M. Govaert; *Zaans Medical Centre, Zaandam* - M. Flens, J. Oomen; *BovenIJ Hospital, Amsterdam* - R. Klicks; *Waterland Hospital, Purmerend* - L. de Widt-Levert; *Netherlands Cancer Institute/Antoni van Leeuwenhoek Hospital, Amsterdam* - H. van Boven, J. Westerga; *Slotervaart Hospital, Amsterdam* - L. de Kock; *Hospital Amstelland, Amstelveen* - S. Veltkamp; *Spaarne Hospital, Hoofddorp* - J. Burggraaf, A. Tanka; *Sint Lucas Andreas Hospital, Amsterdam* - E. Barbé, E. Steller; *Vrije Universiteit Medical Centre, Amsterdam* - W. Mooi, S. Meijer; *Kennemer Gasthuis, Haarlem* - D. Willebrand, H. Rijna; *Rode Kruis Hospital, Beverwijk* - M. Hunfeld; *Tergooi Hospitals, Blaricum* - M. Prins, P. Bor, A. ten Tije; *Tergooi Hospitals, Hilversum* - J. Juttman, S. Luyck-de Bakker; *Comprehensive Cancer Centre West, Leiden* - P. Krijnen, B. Jongejan; *Bronovo Hospital, Den Haag* - I. Koelma, J. van Esser, O. Guicherit; *Diaconessenhuis, Leiden* - J. Graadt van Roggen, R. Vree, E. Planken; *Rijnland Hospital, Leiderdorp* - J. Calame, A. Zeilemaker, W. Molendijk; *Medical Centre Haaglanden, Den Haag* - E. Ooms, A. Marinelli, R. Brouwer; *Medical Centre Haaglanden, Leidschendam* - I. Groot; *'t Lange Land Hospital, Zoetermeer* - B. Jas, A. Ogilvie; *Groene Hart Hospital, Gouda* - M. Giessen, R. Schmitz, A. van der Torren-Konze; *Haga Hospital Leyenburg, Den Haag* - P. Blok, W. Steup, H. Sleeboom; *Haga Hospital Rode Kruis, Den Haag* - J. Merkus; *Leiden University Medical Centre, Leiden* - V. Smit, B. Bonsing; *Reinier de Graaf Groep, Delft* - A. van Leeuwen, C. Marcoen, E. Maartense; *Comprehensive Cancer Centre Eindhoven, Eindhoven* - M. Janssen-Heijnen, A. van den Eijnden-van Rooijen; *Laboratory for Pathology (PAMM), Eindhoven* - M. van Beek; *Catharina Hospital, Eindhoven* - Y. van Riet, G. Creemers; *Máxima Medical Centre, Eindhoven* - O. Repelaer van Driel, M. Nijziel; *Máxima Medical Centre, Veldhoven* - R. Roumen, G. Vreugdenhil; *Sint Anna Zorggroep, Geldrop* - E. Luiten, A. Smals; *Jeroen Bosch Hospital, 's Hertogenbosch* - J. Broekman, W. Gelderman, J. Wissing, S. Bouwer, T. Smilde; *Hospital Bernhoven, Veghel* - B. Storck, N. van Diemen; *Bernhoven Hospital, Oss* - Y. Paquay, A. Vos; *Amphia Hospital Molengracht, Breda* - P. de Wit, J. Nuytinck, G. Ras; *Amphia Hospital Pasteurlaan, Oosterhout* - O. van West, J. van Wissen; *Amphia Hospital Langendijk, Breda* - A. van Gent; *Sint Elizabeth Hospital, Tilburg* - A. Croonen, J. Roukema, J. van Riel; *Tweesteden Hospital, Tilburg* - S. Brenninkmeijer, H. van Ojik; *Elkerliek Hospital, Helmond* - M. Tutein Nolthenius-Puylaert, B. Lemaire; *VieCuri Medical Centre, Venlo* - R. Schapers, P. Nijhuis, A. van der Wouw; *Comprehensive Cancer Centre Rotterdam, Rotterdam* - R. Damhuis, J. Paulides; *Erasmus Medical Centre, Rotterdam* - M. Kliffen; *Medical Centre Rijnmond-Zuid Zuider, Rotterdam* - S. Henzen-Logmans; *Medical Centre Rijnmond-Zuid Clara, Rotterdam* - H. van den Ingh, W. Meijer; *Laboratory for Pathology (PATHAN), Rotterdam* - J. Ruizeveld de Winter; *Vlietland Hospital, Schiedam* - I. Mares-Engelberts; *Ruwaard van Putten Hospital, Spijkenisse* - R. den Toom; *IJsselland Hospital, Capelle aan de IJssel* - G. Tetteroo; *Sint Fransiscus Hospital, Rotterdam* - H. Strijdhorst; *Ikazia Hospital, Rotterdam* - W. Vles; *Haven Hospital, Rotterdam* - J. van Dam; *Albert Schweitzer Hospital, Dordrecht* - P. Westenend, P. Plaisier; *Laboratory for Pathology Zeeland* - L. de Bruijkere; *Hospital Walcheren, Vlissingen* - J. ten Thijsse; *Oosterschelde Hospitals, Goes* - H. de Morree; *Van Weel-Bethesda Hospital, Dirksland* - R. van der Hul;

*Hospital Zeeuw-Vlaanderen, Terneuzen* - W. Mostert, K. Ongena; *Hospital Lievensberg, Bergen op Zoom* - V. Potters, E. Slingenbergh; *Franciscus Hospital, Roosendaal* - H. Kemperman; *Comprehensive Cancer Centre Limburg, Maastricht* - J. Bruijnen, S. Adema; *Maastricht University Medical Hospital, Maastricht* - M. von Meyenfeldt, P. Hupperets; *Maasland Hospital, Sittard* - W. Vos, F. van der Ent, F. Erdkamp; *Atrium Medical Centre Parkstad, Heerlen* - M. Nap, J. van der Bijl, M. Pannebakker; *Laurentius Hospital, Roermond* - A. Willig, C. Finaly-Marais, M. den Boer; *Sint Jans Gasthuis, Weert* - F. Limbeek, P. den Haan; *Comprehensive Cancer Centre Midden-Nederland, Utrecht* - M. van der Heiden-van der Loo, A. Koppejan-Rensenbrink; *Sint Antonius Hospital, Nieuwegein* - C. Seldenrijk, R. Koelemij, P. de Jong; *Mesos Medical Centre, Utrecht* - A. van Wieringen, R. Oltmans; *Zuwe Hofpoort Hospital, Woerden* - J. Vente, M. Verhaar-Langereis; *Diakonessenhuis, Utrecht* - J. van Gorp, T. van Dalen, P. Thunnissen; *Meander Medical Centre, Amersfoort* - E. Ahsmann, A. van Overbeeke, C. Rodenburg; *University Medical Centre Utrecht, Utrecht* - R. van Hilligersberg, E. van der Wall; *Hospital Rivierenland, Tiel* - K. Ong, C. Henkens; *Comprehensive Cancer Centre North East, Enschede, Groningen* - S. Siesling, M. Schaapveld, R. Otter, A. Wit; *Laboratory for Pathology Oost Nederland (LPON), Enschede* - M. Brinkhuis; *Medisch Spectrum Twente, Enschede* - W. Mastboom, W. Smit; *Ziekenhuisgroep Twente Twenteborg, Almelo* - D. van der Velde, R. Hoekstra; *Ziekenhuisgroep Twente SMT, Hengelo* - H. Heijmans, H. Dankbaar; *Streekziekenhuis Koningin Beatrix, Winterswijk* - F. Slootmans, P. Schiphorst; *Gelre Hospitals, Apeldoorn* - E. Weltevreden, J. Roussel, S. Radema; *Hospital Spitaal, Zutphen* - J. Ketel, O. van Dobbenburgh; *Deventer Hospital, Deventer* - J. Arends, H. de Vries, A. Imholz; *Laboratory for Pathology (LVF), Leeuwarden* - H. Eggink; *Antonius Hospital, Sneek* - E. Mulder, G. Woolthuis; *Medical Centre Leeuwarden, Leeuwarden* - C. Hoff, H. de Graaf; *Hospital Nij Smellinghe, Drachten* - H. van der Mijle, H. van Kamp; *Hospital Talma Sionsberg, Dokkum* - J. Kaspers, J. de Graaf; *Hospital de Tjongerschans, Heerenveen* - P. Veldman, J. de Boer; *Bethesda Hospital, Hoogeveen* - G. Freling, R. Haasen, J. Haasjes; *Röpke-Zweers Hospital, Hardenberg* - M. Jagers, R. Blankenburgh; *Diaconessenhuis, Meppel* - L. Hanssen, H. de Korte; *Isala Klinieken, Zwolle* - A. Jonker, E. Pierik, J. de Graaf; *Laboratory for Pathology, Winschoten* - C. Schoots; *Sint Lucas Hospital, Winschoten* - M. Klöppner, H. Potthoff; *Refaja Hospital, Stadskanaal* - A. Kemper, J. Jansen; *Delfzicht Hospital, Delfzijl* - J. Ashruf, Z. Erjavec; *Martini Hospital, Groningen* - A. Groote, A. Olieman, R. de Jong; *University Medical Centre Groningen, Groningen* - A. Suurmeijer, J. de Vries, P. Willemse; *Wilhelmina Hospital, Assen* - R. Wijffels, F. Blok; *Scheper Hospital, Emmen* - M. van den Aardweg, E. Weernink – *all in the Netherlands*.

**Supplementary Table 2. Number of First Events after 5-Year Follow-Up and 5-Year First Event Rate According to Cohort**

| Cohort                             | No. of Patients | Contralateral Breast Cancer |                             | Locoregional Recurrence |                             | Distant Metastases  |                             |
|------------------------------------|-----------------|-----------------------------|-----------------------------|-------------------------|-----------------------------|---------------------|-----------------------------|
|                                    |                 | No. of First Events         | 5-Year First Event Rate (%) | No. of First Events     | 5-Year First Event Rate (%) | No. of First Events | 5-Year First Event Rate (%) |
| Node-Negative, No Adjuvant Therapy | 856             | 21                          | 2.6                         | 30                      | 3.7                         | 23                  | 2.8                         |
| Node-Positive, No Adjuvant Therapy | 856             | 35                          | 5.6                         | 42                      | 6.6                         | 30                  | 4.6                         |
| Isolated tumor cells               | 513             | 20                          | 5.4                         | 24                      | 6.2                         | 15                  | 3.7                         |
| Micrometastases                    | 343             | 15                          | 5.9                         | 18                      | 6.8                         | 15                  | 6.3                         |
| Node-Positive, Adjuvant Therapy    | 995             | 11                          | 1.2                         | 20                      | 2.6                         | 20                  | 2.6                         |
| Isolated tumor cells               | 306             | 4                           | 1.3                         | 8                       | 3.8                         | 3                   | 1.2                         |
| Micrometastases                    | 689             | 9                           | 1.2                         | 12                      | 1.9                         | 17                  | 3.2                         |
| All                                | 2707            | 67                          | 2.9                         | 92                      | 4.1                         | 73                  | 3.2                         |

**Supplementary Table 3. Cox Proportional-Hazards Model of the Effect of Variables on Events According to the Presence or Absence of Isolated Tumor Cells or Micrometastases (Axillary Lymph-Node Dissection Included in the Model)**

| Variable                                                          | Node-Negative vs. Isolated Tumor Cells or Micrometastases, All with No Adjuvant Therapy |         | Node-Negative vs. Isolated Tumor Cells, Both with No Adjuvant Therapy |         | Node-Negative, No Adjuvant Therapy vs. Micrometastases, Both with No Adjuvant Therapy |         |
|-------------------------------------------------------------------|-----------------------------------------------------------------------------------------|---------|-----------------------------------------------------------------------|---------|---------------------------------------------------------------------------------------|---------|
|                                                                   | Hazard Ratio for Events (95% CI)                                                        | P Value | Hazard Ratio for Events (95% CI)                                      | P Value | Hazard Ratio for Events (95% CI)                                                      | P Value |
| Node-negative                                                     | 1.00                                                                                    |         | 1.00                                                                  |         | 1.00                                                                                  |         |
| Node-positive, isolated tumor cells or micrometastases            | 1.59 (1.24-2.04)                                                                        | <0.001  | –                                                                     | –       | –                                                                                     | –       |
| Isolated tumor cells                                              | –                                                                                       | –       | 1.54 (1.17-2.03)                                                      | 0.002   | –                                                                                     | –       |
| Micrometastases                                                   | –                                                                                       | –       | –                                                                     | –       | 1.81 (1.25-2.61)                                                                      | 0.002   |
| Age at diagnosis (year)*                                          | 1.01 (1.00-1.02)                                                                        | 0.02    | 1.02 (1.01-1.03)                                                      | 0.002   | 1.01 (1.00-1.02)                                                                      | 0.15    |
| Tumor size†                                                       | 1.23 (1.03-1.47)                                                                        | 0.02    | 1.26 (1.03-1.54)                                                      | 0.02    | 1.22 (0.98-1.53)                                                                      | 0.08    |
| Tumor grade                                                       |                                                                                         |         |                                                                       |         |                                                                                       |         |
| 1                                                                 | 1.00                                                                                    |         | 1.00                                                                  |         | 1.00                                                                                  |         |
| 2                                                                 | 1.53 (1.18-1.99)                                                                        | 0.001   | 1.75 (1.30-2.36)                                                      | <0.001  | 1.50 (1.09-2.06)                                                                      | 0.01    |
| 3                                                                 | 2.15 (1.28-3.63)                                                                        | 0.004   | 2.41 (1.36-4.29)                                                      | 0.003   | 2.27 (1.24-4.15)                                                                      | 0.008   |
| Expression of estrogen receptors, progesterone receptors, or both |                                                                                         |         |                                                                       |         |                                                                                       |         |
| Yes                                                               | 1.00                                                                                    |         | 1.00                                                                  |         | 1.00                                                                                  |         |
| No                                                                | 1.52 (1.04-2.23)                                                                        | 0.03    | 1.63 (1.07-2.48)                                                      | 0.02    | 1.34 (0.82-2.20)                                                                      | 0.25    |
| Axillary lymph-node dissection                                    |                                                                                         |         |                                                                       |         |                                                                                       |         |
| Yes                                                               | 1.00                                                                                    |         | 1.00                                                                  |         | 1.00                                                                                  |         |
| No                                                                | 1.16 (0.89-1.51)                                                                        | 0.28    | 1.13 (0.83-1.55)                                                      | 0.44    | 1.31 (0.90-1.90)                                                                      | 0.15    |

\*Age was modeled as continuous variable.

† The hazard ratio is for a doubling of tumor diameter.

| Supplementary Table 4. Disease-Free Survival (DFS) Rates According to Type of Systemic Adjuvant Therapy |                                    |                     |                                 |                     |                                                                         |
|---------------------------------------------------------------------------------------------------------|------------------------------------|---------------------|---------------------------------|---------------------|-------------------------------------------------------------------------|
| Type of Systemic Adjuvant Therapy                                                                       | Node-Positive, No Adjuvant Therapy |                     | Node-Positive, Adjuvant Therapy |                     | P Value<br>(Compared with<br>No Chemotherapy<br>or Hormonal<br>Therapy) |
|                                                                                                         | N (%)                              | 5 year DFS Rate (%) | N (%)                           | 5 year DFS Rate (%) |                                                                         |
| No chemotherapy or hormonal therapy                                                                     | 856 (100)                          | 76.5                | 0 (0)                           | NA                  | NA                                                                      |
| Chemotherapy                                                                                            | 0 (0)                              | NA                  | 60 (6.0)                        | 83.4                | 0.41                                                                    |
| Hormonal therapy                                                                                        | 0 (0)                              | NA                  | 627 (63.0)                      | 84.2                | 0.002                                                                   |
| Both chemotherapy or hormonal therapy                                                                   | 0 (0)                              | NA                  | 308 (31.0)                      | 91.3                | <0.001                                                                  |

**Supplementary Table 5. Cox Proportional-Hazards Model of the Effects of Type of Systemic Adjuvant Therapy on Events**

| Variable                              | Hazard Ratio for Events<br>(95% CI) | P Value |
|---------------------------------------|-------------------------------------|---------|
| Node-Positive, No Adjuvant Therapy    | 1.00                                |         |
| Node-Positive, Adjuvant Therapy       |                                     |         |
| Chemotherapy                          | 0.82 (0.41-1.61)                    | 0.56    |
| Hormonal therapy                      | 0.60 (0.46-0.80)                    | <0.001  |
| Both chemotherapy or hormonal therapy | 0.34 (0.21-0.55)                    | <0.001  |

Age at diagnosis (modeled as a continuous variable), tumor size (the hazard ratio is for a doubling of the tumor diameter), tumor grade, and axillary treatment also included as variables in the Cox proportional-hazards model.
